# Supplementary material for: Virus-Specific Stem Cell Memory CD8+ T Cells May Indicate a Long-Term Protection against Evolving SARS-CoV-2
Source: MDPI journal article supplement (doi:10.3390/diagnostics13071280), 2023-03-28
Supplement: s1 [file s1]

## Supplementary data

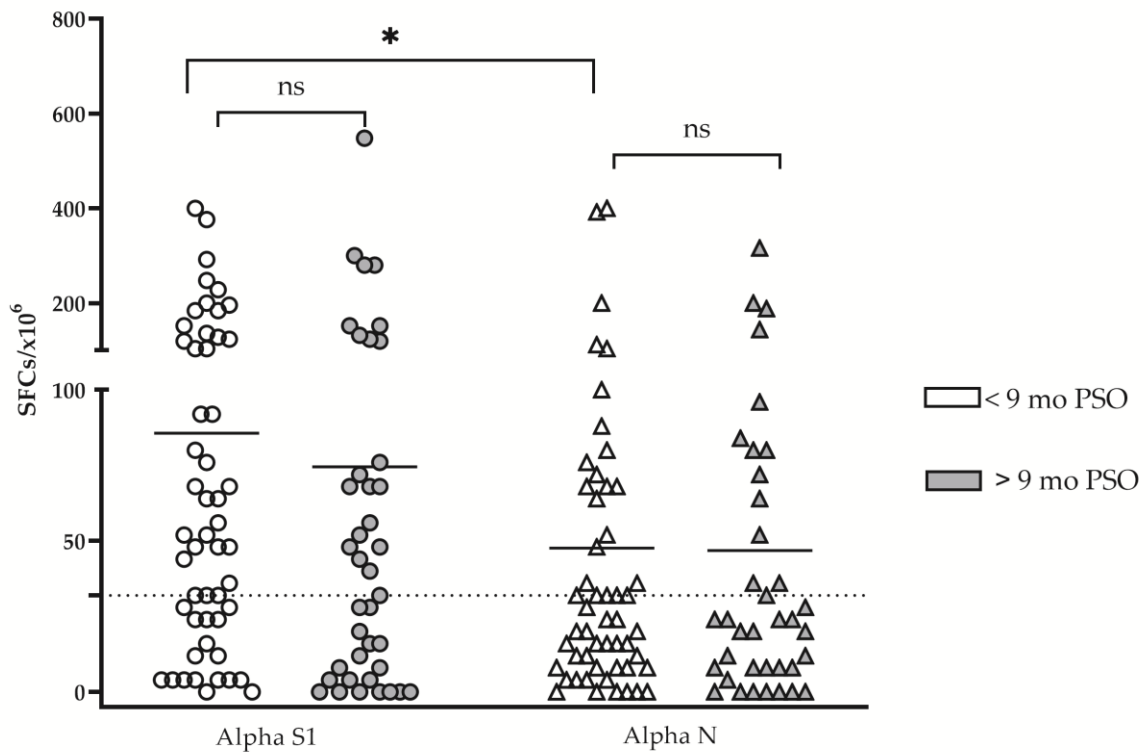

**Figure S1.** Individual values for the number of S1- (circles) and N- (triangles) specific IFN- $\gamma$  secreting T-cells. The dotted line corresponds to the cut-off level (32 SFCs/106 PMBCs). The responses <9 mo and >9 mo PSO are compared.

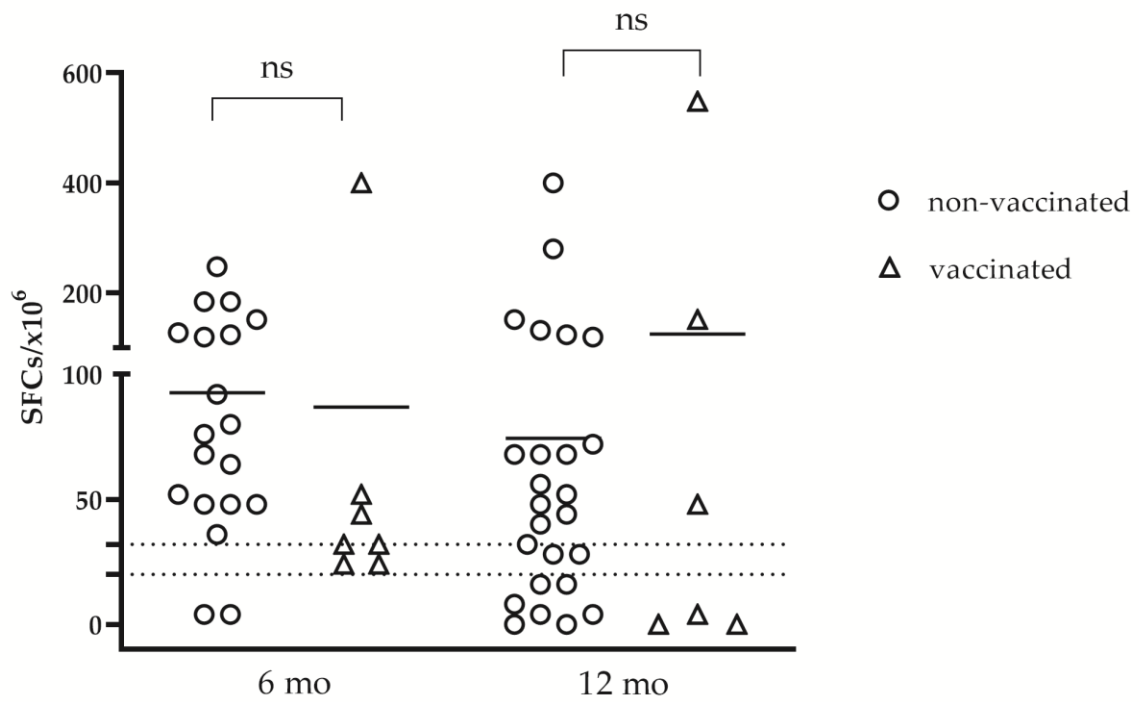

**Figure S2.** Individual values for the number of S1- specific IFN- $\gamma$  secreting T-cells in non-vaccinated and vaccinated donors. The dotted line corresponds to the cut-off level (32 SFCs/10 6PMBCs). The responses at 6 mo and 12 mo PSO are compared.
